# Supplementary material for: Clinical outcomes of COVID-19 infection in patients with osteoporosis: a nationwide cohort study in Korea using the common data model
Source: PubMed Central journal article supplement — Sci Rep. 2024 Jul 31;14:17738. doi: 10.1038/s41598-024-68356-0 (PMC11291711; doi:10.1038/s41598-024-68356-0), 2024-07-31

**Supplemental Table 1 . Concept sets for the definition of target and comparator cohorts**

| <b>Category</b>          | <b>Concept ID</b> | <b>Concept name</b>                                   | <b>Domain</b> | <b>Vocabulary</b> | <b>Excluded</b> | <b>Descendants</b> | <b>Mapped</b> |
|--------------------------|-------------------|-------------------------------------------------------|---------------|-------------------|-----------------|--------------------|---------------|
| COVID-19 infection       | 704996            | Patient meets COVID-19 laboratory diagnostic criteria | Observation   | OMOP Extension    | NO              | NO                 | NO            |
| Osteoporosis             | 80502             | Osteoporosis                                          | Condition     | SNOMED            | NO              | YES                | NO            |
| Fractures                | 4115176           | Pathological fracture - ankle and/or foot             | Condition     | SNOMED            | NO              | NO                 | NO            |
|                          | 440511            | Pathological fracture - forearm                       | Condition     | SNOMED            | NO              | NO                 | NO            |
|                          | 4118017           | Pathological fracture - hand                          | Condition     | SNOMED            | NO              | NO                 | NO            |
|                          | 440812            | Pathological fracture - lower leg                     | Condition     | SNOMED            | NO              | NO                 | NO            |
|                          | 434140            | Pathological fracture - pelvis and/or thigh           | Condition     | SNOMED            | NO              | NO                 | NO            |
|                          | 4117701           | Pathological fracture - shoulder                      | Condition     | SNOMED            | NO              | NO                 | NO            |
|                          | 436206            | Pathological fracture - upper arm                     | Condition     | SNOMED            | NO              | NO                 | NO            |
|                          | 45767042          | Pathological fracture of humerus due to osteoporosis  | Condition     | SNOMED            | NO              | NO                 | NO            |
|                          | 4115175           | Pathological fractures - multiple                     | Condition     | SNOMED            | NO              | NO                 | NO            |
| Osteoporosis medications | 1557272           | alendronate                                           | Drug          | RxNorm            | NO              | YES                | NO            |
|                          | 43534826          | alendronic acid and alfacalcidol, sequential; oral    | Drug          | ATC               | NO              | YES                | NO            |

|          |                                                                      |      |        |    |     |    |
|----------|----------------------------------------------------------------------|------|--------|----|-----|----|
| 21604160 | alendronic acid and<br>cholecalciferol; oral                         | Drug | ATC    | NO | YES | NO |
| 40254956 | alendronic acid, calcium<br>and cholecalciferol,<br>sequential; oral | Drug | ATC    | NO | YES | NO |
| 21604152 | alendronic acid; oral                                                | Drug | ATC    | NO | YES | NO |
| 44506794 | bazedoxifene                                                         | Drug | RxNorm | NO | YES | NO |
| 21602626 | bazedoxifene; oral                                                   | Drug | ATC    | NO | YES | NO |
| 40222444 | denosumab                                                            | Drug | RxNorm | NO | YES | NO |
| 21604169 | denosumab; parenteral                                                | Drug | ATC    | NO | YES | NO |
| 1512480  | ibandronate                                                          | Drug | RxNorm | NO | YES | NO |
| 21604154 | ibandronic acid; systemic                                            | Drug | ATC    | NO | YES | NO |
| 1513103  | raloxifene                                                           | Drug | RxNorm | NO | YES | NO |
| 21602625 | raloxifene; oral                                                     | Drug | ATC    | NO | YES | NO |
| 1516800  | risedronate                                                          | Drug | RxNorm | NO | YES | NO |
| 21604159 | risedronic acid and<br>calcium, sequential; oral                     | Drug | ATC    | NO | YES | NO |
| 45893276 | risedronic acid and<br>cholecalciferol; systemic                     | Drug | ATC    | NO | YES | NO |
| 21604161 | risedronic acid, calcium<br>and cholecalciferol,<br>sequential; oral | Drug | ATC    | NO | YES | NO |
| 21604155 | risedronic acid; oral                                                | Drug | ATC    | NO | YES | NO |
| 1511251  | romosozumab                                                          | Drug | RxNorm | NO | YES | NO |
| 1521987  | teriparatide                                                         | Drug | RxNorm | NO | YES | NO |
| 21602783 | teriparatide; parenteral                                             | Drug | ATC    | NO | YES | NO |
| 1524674  | zoledronic acid                                                      | Drug | RxNorm | NO | YES | NO |

|  |          |                                                                          |      |     |    |     |    |
|--|----------|--------------------------------------------------------------------------|------|-----|----|-----|----|
|  | 1588679  | zoledronic acid, calcium<br>and cholecalciferol,<br>sequential; systemic | Drug | ATC | NO | YES | NO |
|  | 21604156 | zoledronic acid;<br>parenteral                                           | Drug | ATC | NO | YES | NO |

**Supplemental Table 2. Concept sets for the definition of outcome cohorts**

| Category        | Concept Id    | Concept Name                                            | Domain                             | Vocabulary | Excluded | Descendants | Mapped |    |
|-----------------|---------------|---------------------------------------------------------|------------------------------------|------------|----------|-------------|--------|----|
| Pneumonia       | 45770911      | Acute pneumonia due to coccidioidomycosis               | Condition                          | SNOMED     | YES      | YES         | NO     |    |
|                 | 4001167       | Acute ulcerative gastroenteritis complicating pneumonia | Condition                          | SNOMED     | YES      | YES         | NO     |    |
|                 | 4050869       | Atypical pneumonia                                      | Condition                          | SNOMED     | NO       | YES         | NO     |    |
|                 | 4049965       | Fungal pneumonia                                        | Condition                          | SNOMED     | YES      | YES         | NO     |    |
|                 | 36712839      | Idiopathic pneumonia syndrome                           | Condition                          | SNOMED     | YES      | YES         | NO     |    |
|                 | 252552        | Ornithosis with pneumonia                               | Condition                          | SNOMED     | YES      | YES         | NO     |    |
|                 | 255848        | Pneumonia                                               | Condition                          | SNOMED     | NO       | YES         | NO     |    |
| Hospitalization | 262           | Emergency Room and Inpatient Visit                      | Visit                              | Visit      | NO       | YES         | NO     |    |
|                 | 9201          | Inpatient Visit                                         | Visit                              | Visit      | NO       | YES         | NO     |    |
| ARDS            | 4191650       | Acute respiratory distress                              | Condition                          | SNOMED     | YES      | YES         | NO     |    |
|                 | 4195694       | Acute respiratory distress syndrome                     | Condition                          | SNOMED     | NO       | YES         | NO     |    |
|                 | 319049        | Acute respiratory failure                               | Condition                          | SNOMED     | NO       | YES         | NO     |    |
|                 | 258866        | Respiratory distress syndrome in the newborn            | Condition                          | SNOMED     | YES      | YES         | NO     |    |
| MACE            | Acute MI      | 4329847                                                 | Myocardial infarction              | Condition  | SNOMED   | NO          | YES    | NO |
|                 |               | 314666                                                  | Old myocardial infarction          | Condition  | SNOMED   | YES         | YES    | NO |
|                 | Heart failure | 315295                                                  | Congestive rheumatic heart failure | Condition  | SNOMED   | YES         | YES    | NO |
|                 |               | 316139                                                  | Heart failure                      | Condition  | SNOMED   | NO          | YES    | NO |
|                 | Stroke        | 372924                                                  | Cerebral artery occlusion          | Condition  | SNOMED   | NO          | NO     | NO |
|                 |               | 375557                                                  | Cerebral embolism                  | Condition  | SNOMED   | NO          | NO     | NO |
|                 |               | 443454                                                  | Cerebral infarction                | Condition  | SNOMED   | NO          | YES    | NO |
|                 |               | 441874                                                  | Cerebral thrombosis                | Condition  | SNOMED   | NO          | NO     | NO |

|                        |                      |                                                     |                                                    |             |        |     |     |    |
|------------------------|----------------------|-----------------------------------------------------|----------------------------------------------------|-------------|--------|-----|-----|----|
| Cerebral hemorrhage    | 376713               | Cerebral hemorrhage                                 | Condition                                          | SNOMED      | NO     | NO  | NO  |    |
|                        | 439847               | Intracranial hemorrhage                             | Condition                                          | SNOMED      | NO     | NO  | NO  |    |
|                        | 43530674             | Spontaneous cerebellar hemorrhage                   | Condition                                          | SNOMED      | NO     | NO  | NO  |    |
|                        | 43530727             | Spontaneous cerebral hemorrhage                     | Condition                                          | SNOMED      | NO     | NO  | NO  |    |
|                        | 42535425             | Spontaneous hemorrhage of cerebral hemisphere       | Condition                                          | SNOMED      | NO     | NO  | NO  |    |
|                        | 4148906              | Spontaneous subarachnoid hemorrhage                 | Condition                                          | SNOMED      | NO     | NO  | NO  |    |
|                        | 432923               | Subarachnoid hemorrhage                             | Condition                                          | SNOMED      | NO     | NO  | NO  |    |
|                        | Sudden cardiac death | 4048809                                             | Brainstem death                                    | Condition   | SNOMED | NO  | YES | NO |
|                        |                      | 321042                                              | Cardiac arrest                                     | Condition   | SNOMED | NO  | YES | NO |
|                        |                      | 442289                                              | Death in less than 24 hours from onset of symptoms | Observation | SNOMED | NO  | YES | NO |
| 4317150                |                      | Sudden cardiac death                                | Condition                                          | SNOMED      | NO     | YES | NO  |    |
| 4132309                |                      | Sudden death                                        | Observation                                        | SNOMED      | NO     | YES | NO  |    |
| 437894                 |                      | Ventricular fibrillation                            | Condition                                          | SNOMED      | YES    | YES | NO  |    |
| Venous thromboembolism |                      | 435616                                              | Amniotic fluid embolism                            | Condition   | SNOMED | YES | YES | NO |
|                        | 435887               | Antepartum deep vein thrombosis                     | Condition                                          | SNOMED      | YES    | YES | NO  |    |
|                        | 196715               | Budd-Chiari syndrome                                | Condition                                          | SNOMED      | YES    | YES | NO  |    |
|                        | 4062269              | Cerebral venous thrombosis in pregnancy             | Condition                                          | SNOMED      | YES    | YES | NO  |    |
|                        | 40481089             | Embolism from thrombosis of vein of lower extremity | Condition                                          | SNOMED      | NO     | YES | NO  |    |
|                        | 442055               | Obstetric air pulmonary embolism                    | Condition                                          | SNOMED      | YES    | YES | NO  |    |
|                        | 433832               | Obstetric blood-clot pulmonary embolism             | Condition                                          | SNOMED      | YES    | YES | NO  |    |
|                        | 435026               | Obstetric pulmonary embolism                        | Condition                                          | SNOMED      | YES    | YES | NO  |    |
|                        | 440477               | Obstetric pyemic and septic pulmonary embolism      | Condition                                          | SNOMED      | YES    | YES | NO  |    |

|          |                                                             |           |        |     |     |    |
|----------|-------------------------------------------------------------|-----------|--------|-----|-----|----|
| 318137   | Phlebitis and thrombophlebitis of intracranial sinuses      | Condition | SNOMED | YES | YES | NO |
| 199837   | Portal vein thrombosis                                      | Condition | SNOMED | YES | YES | NO |
| 438820   | Postpartum deep phlebothrombosis                            | Condition | SNOMED | YES | YES | NO |
| 440417   | Pulmonary embolism                                          | Condition | SNOMED | NO  | YES | NO |
| 254662   | Pulmonary infarction                                        | Condition | SNOMED | NO  | YES | NO |
| 36713113 | Saddle embolus of pulmonary artery                          | Condition | SNOMED | NO  | YES | NO |
| 35615055 | Saddle embolus of pulmonary artery with acute cor pulmonale | Condition | SNOMED | NO  | YES | NO |
| 4235812  | Septic thrombophlebitis                                     | Condition | SNOMED | YES | YES | NO |
| 195294   | Thrombosed hemorrhoids                                      | Condition | SNOMED | YES | YES | NO |
| 4187790  | Thrombosis of retinal vein                                  | Condition | SNOMED | YES | YES | NO |
| 318775   | Venous embolism                                             | Condition | SNOMED | NO  | YES | NO |
| 444247   | Venous thrombosis                                           | Condition | SNOMED | NO  | YES | NO |

ARDS, acute respiratory distress syndrome, MACE, major cardiovascular adverse event, MI, myocardial infarction

**Supplemental Figure 1. Covariate balance before and after large-scale PS stratification. Each dot represents standardized difference of means for a single variate before and after PS stratification. PS, propensity score.**

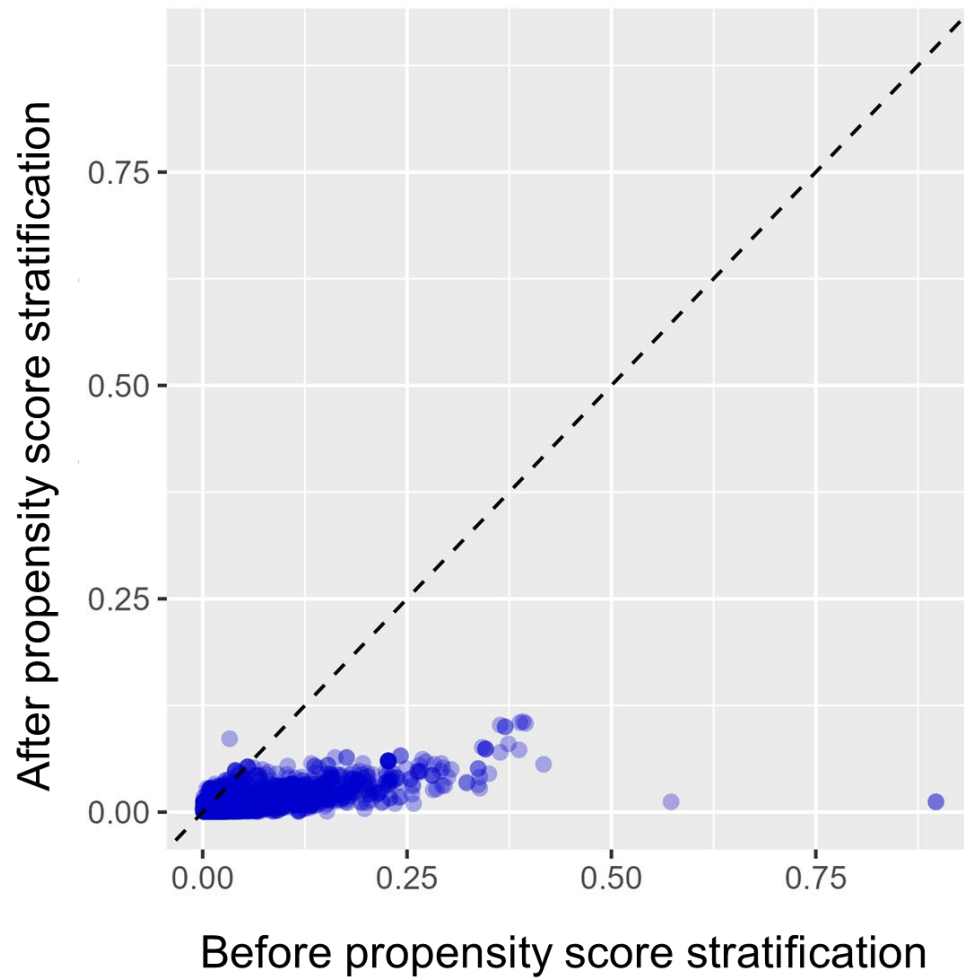

**Supplemental Figure 2. Preference score distributions for osteoporosis and non-osteoporosis groups. Preference score is a transformation of the propensity score that adjusts for differences in the sizes of the two treatment groups. A higher overlap indicates subjects in the two groups were more similar in terms of their predicted probability of receiving one treatment over the other. Red: osteoporosis group, Blue: non-osteoporosis group.**

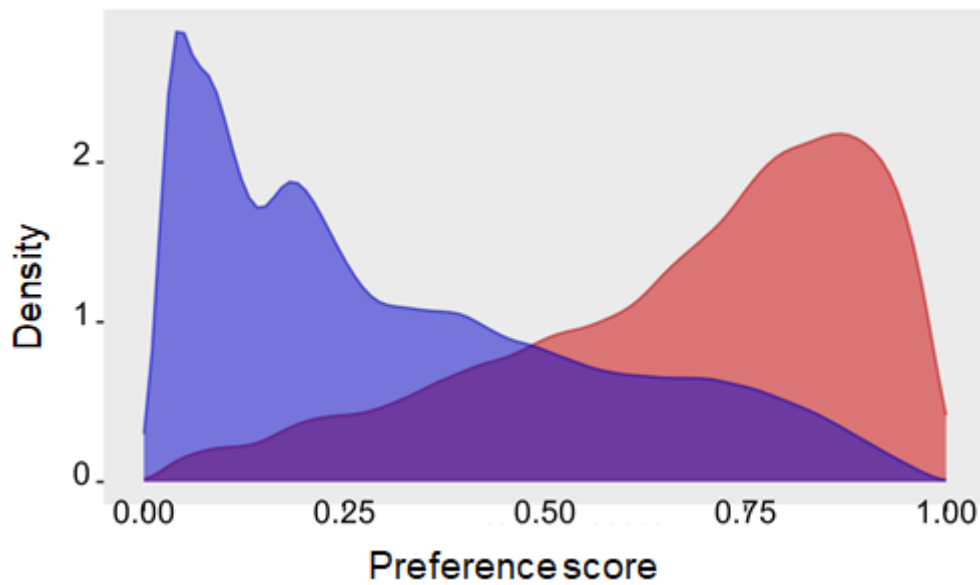



**Supplemental Figure 3. Odds ratios for clinical outcomes within 90 days after COVID-19 infection in patients with a previous history of osteoporosis after large-scale PS stratification. ARDS, acute respiratory distress syndrome, MACE, major adverse cardiovascular events, VTE, venous thromboembolism, ORs, odds ratios, CI, confidence interval. Logistic regression analysis was performed after large-scale PS stratification.**

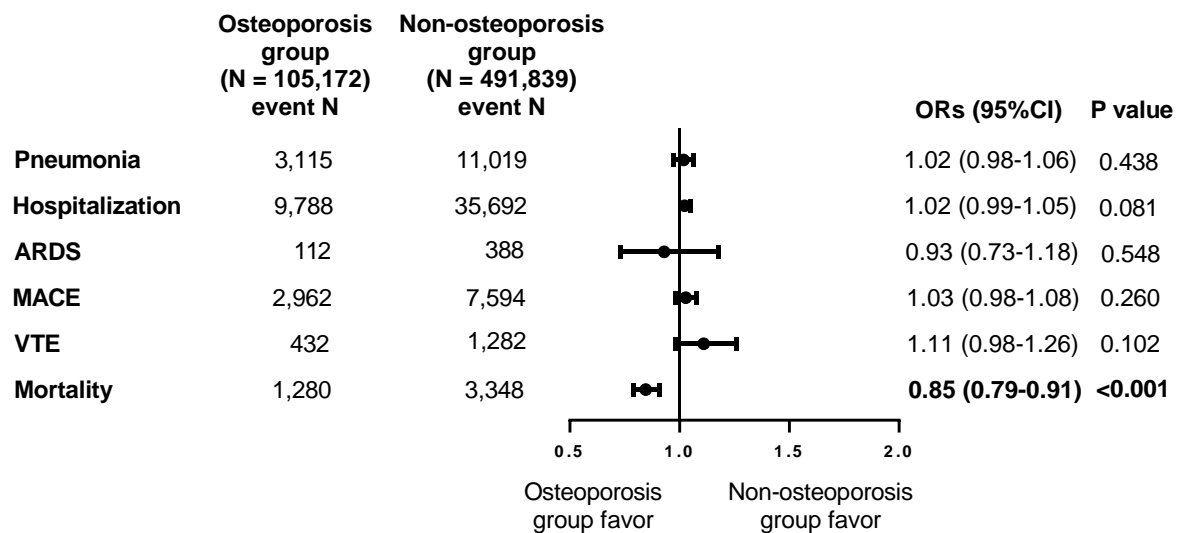

**Supplemental Figure 4. Odds ratios for clinical outcomes within 90 days after COVID-19 infection in patients with a previous history of osteoporosis according to sex after large-scale PS stratification. (a) Women (b) Men. ARDS, acute respiratory distress syndrome, MACE, major adverse cardiovascular events, VTE, venous thromboembolism, ORs, odds ratios, CI, confidence interval. Logistic regression analysis was performed after large-scale PS stratification.**

**(a) Women**

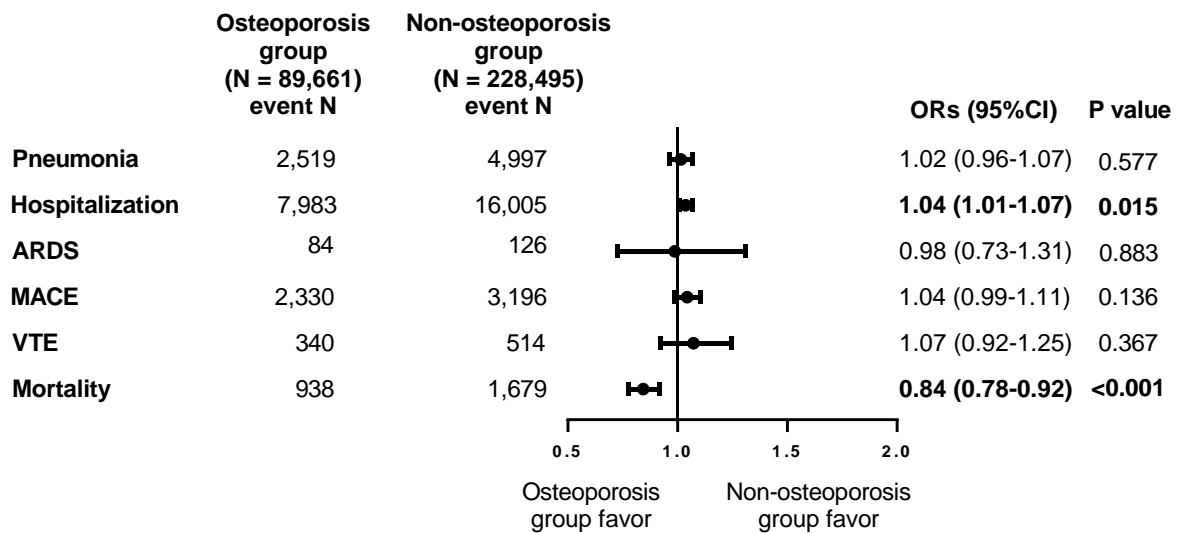

**(b) Men**

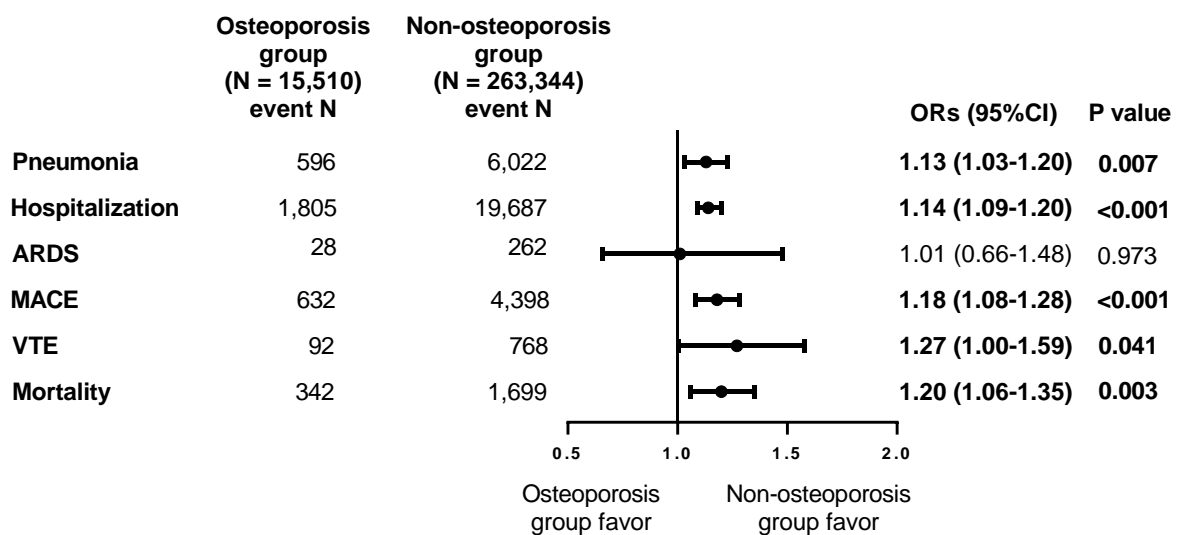

**Supplemental Figure 5. Odds ratios for clinical outcomes within 90 days after COVID-19 infection according to previous history of fractures after large-scale PS stratification. (a) The fracture group (b) The non-fracture group. ARDS, acute respiratory distress syndrome, MACE, major adverse cardiovascular events, VTE, venous thromboembolism, ORs, odds ratios, CI, confidence interval. Logistic regression analysis was performed after large-scale PS stratification.**

**(a) Fracture group**

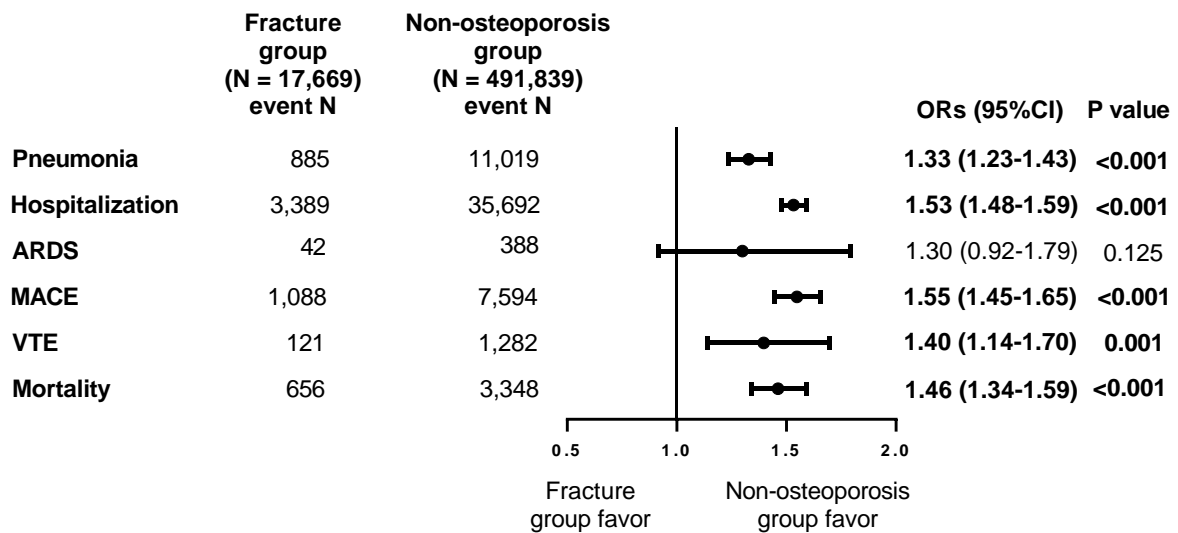

**(b) Non-fracture group**

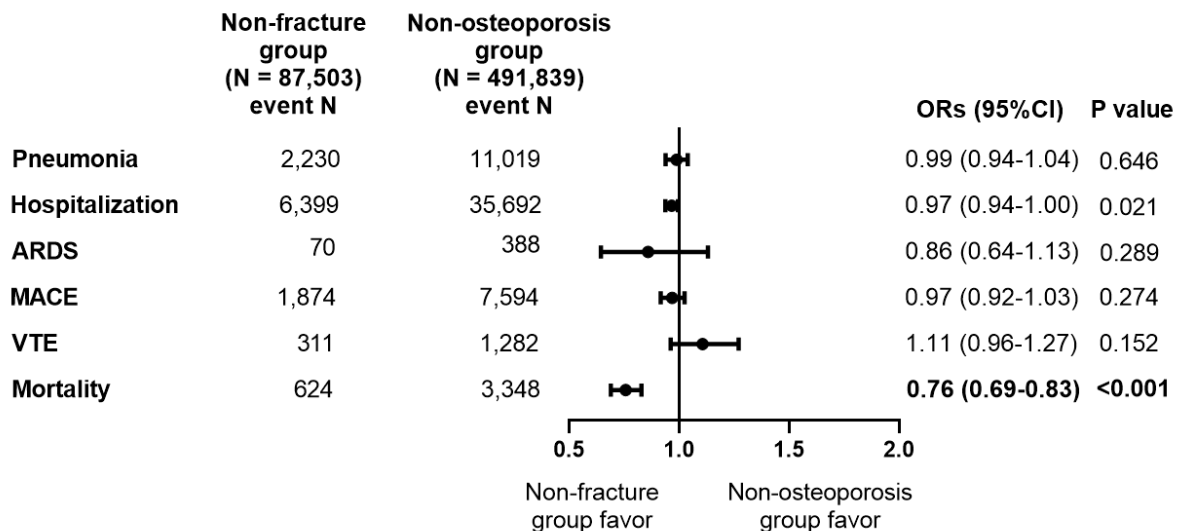

Supplement: 41598_2024_68356_MOESM1_ESM.pdf [file 41598_2024_68356_MOESM1_ESM.pdf]
